# Supplementary material
Source: PubMed Central journal article supplement (PMC5767876)
Supplement: 10.1074_M117.808634_jbc.M117.808634-1.pdf [file 10.1074_M117.808634_jbc.M117.808634-1.pdf]

### Supplementary Table 1

Target sequence for designing gRNA for knock-out of *cryaba* and *cryabb*

| Gene          | Primer | Targeted Sequence  |
|---------------|--------|--------------------|
| <i>cryaba</i> | T01    | GGCGCTTCCAAGCTGGT  |
|               | T02    | GTAAAACATGGTGTAGAA |
|               | T03    | CTGATCAAAAATTCGATA |
|               | T04    | ACAAGGGTCGGCGATACC |
| <i>cryabb</i> | T01    | GCCGGAACGGGGGATTGA |
|               | T02    | CTCCCCAAATTGCCGGCG |
|               | T03    | ATCGTTGGGAGTACAATG |
|               | T04    | TTCGCAGTCCAAGCTGGA |

## Supplementary Table 2

### Primer sequence for initial screening KO in *cryaba* and *cryabb*

| Gene          |         | Primer Sequence       |
|---------------|---------|-----------------------|
| <i>cryaba</i> | Forward | AATGAGCCAGAGGGGAAGAG  |
|               | Reverse | TGTGAAAATGTCCTTGCATCA |
| <i>cryabb</i> | Forward | GGAAGGGGAGAACACAGTGG  |
|               | Reverse | ACGCGTGACTCCTCAACTTT  |

### Supplementary Table 3

Primer sequence for PCR amplification to genotype alleles of *cryaba* and *cryabb* (5' → 3')

| Gene          | Allele                    |         | Primer Sequence         |
|---------------|---------------------------|---------|-------------------------|
| <i>cryaba</i> | $\alpha B1^{ins\ 5bp}$    | Forward | AGCCCAGCATTTGAGACTCTATG |
|               |                           | Reverse | GTGTAGAAAGGTGAAAAAGGGTC |
| <i>cryaba</i> | $\alpha B1^{\Delta 35bp}$ | Forward | ATAGATCAGTGGCTGACACGAGG |
|               |                           | Reverse | CATGCCACTGTCCCACCAGC    |
| <i>cryabb</i> | $\alpha B2^{\Delta 10bp}$ | Forward | GGAAGGGGAGAACACAGTGG    |
|               | $\alpha B2^{\Delta 8bp}$  | Reverse | ACGCGTGACTCCTCAACTTT    |

#### Supplementary Table 4

##### Primer sequence for qPCR (5' → 3')

| Gene           |         | Primer Sequence         |
|----------------|---------|-------------------------|
| <i>cryaa</i>   | Forward | AGGGCAAGCATGGAGAAAG     |
|                | Reverse | GCAGACAGTGTGCAGGTGAT    |
| <i>cryaba</i>  | Forward | GCATGTCCGAGATGAGACAG    |
|                | Reverse | CTGCCGTTTCATCATGTTTTTC  |
| <i>cryabb</i>  | Forward | TCTTCCTTTCTTCGCAGTCC    |
|                | Reverse | TGATAGCTCCTCTGGTGCAA    |
| <i>pepck</i>   | Forward | AACTCCAGGTTTTGTGCCCC    |
|                | Reverse | TACACCAAAGGCACACCTTCT   |
| <i>pxr</i>     | Forward | ATGAAGTGACGGGAATTTGGG   |
|                | Reverse | GATGGTGCTGAAAACCAGCTC   |
| <i>fkbp5</i>   | Forward | GTCGACTGTTTGATTTCGCGG   |
|                | Reverse | AGGCGTACTTGGGCTTTAGG    |
| <i>β-actin</i> | Forward | CGAGCTGTCTTCCCATCCA     |
|                | Reverse | TCACCAACGTAGCTGTCTTTCTG |
